# Supplementary material for: Zirconocene-catalyzed stereoselective cyclocopolymerization of 2-methyl-1,5-hexadiene with propylene
Source: Royal Society of Chemistry journal article supplement (doi:10.1039/c4py00612g), 2014-06-27
Supplement: c4py00612g1.pdf [file c4py00612g1.pdf]

## Zirconocene-Catalyzed Stereoselective Cyclocopolymerization of 2-Methyl-1,5-Hexadiene with Propylene

Manuela Bader,<sup>a,†</sup> Gabriel Theurkauff,<sup>a,†</sup> Katty Den Dauw,<sup>b</sup> Christian Lamotte,<sup>b</sup> Olivier Lhost,<sup>b</sup> Evgueni Kirillov,<sup>a,\*</sup> and Jean-François Carpentier<sup>a,\*</sup>

<sup>a</sup> *Organometallics, Materials and Catalysis laboratories, Institut des Sciences Chimiques de Rennes, UMR 6226 CNRS-Université de Rennes 1, F-35042 Rennes, France*

<sup>b</sup> *Total Raffinage Chimie, Zone Industrielle Feluy C, B-7181 Seneffe, Belgium*

**Figure S1.** <sup>1</sup>H NMR spectrum of PP copolymers with model olefins 8-TMSO and 1,6-MOD.

**Figure S2.** <sup>1</sup>H NMR spectrum of a P(P-*co*-MHB) copolymer produced with constrained geometry catalyst 4/MAO.

**Figure S3.** GPC trace of a P(P-*co*-MHB) copolymer produced with 1/MAO.

**Figure S4.** GPC trace of a P(P-*co*-MHB) copolymer produced with 2/MAO.

**Figure S5.** GPC trace of a P(P-*co*-MHB) copolymer produced with 3/MAO.

**Figure S6.** DSC thermogram of a P(P-*co*-MHB) copolymer produced with 1/MAO.

**Figure S7.** DSC thermogram of a P(P-*co*-MHB) copolymer produced with 2/MAO.

**Figure S8.** DSC thermogram of a P(P-*co*-MHB) copolymer produced with 3/MAO.

---

† Those two authors equally contributed to this work.

\* Correspondence to Evgueni Kirillov ([evgueni.kirillov@univ-rennes1.fr](mailto:evgueni.kirillov@univ-rennes1.fr)) and Jean-François Carpentier ([jean-francois.carpentier@univ-rennes1.fr](mailto:jean-francois.carpentier@univ-rennes1.fr)); Fax: +33 (0)223236938.

## Supporting Information

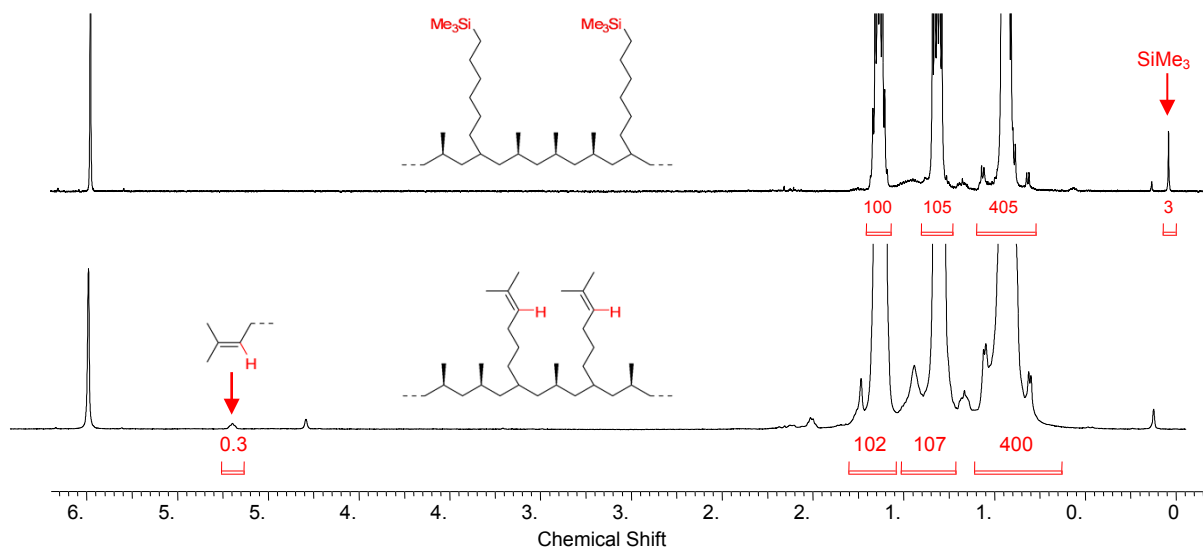

**Figure S1:**  $^1\text{H}$  NMR (398 K,  $\text{C}_2\text{D}_2\text{Cl}_4$ , 500 MHz) of PP copolymers with model olefins 8-TMSO (top spectrum) and 1,6-MOD (bottom spectrum) (Table 1, entries 15 and 16).

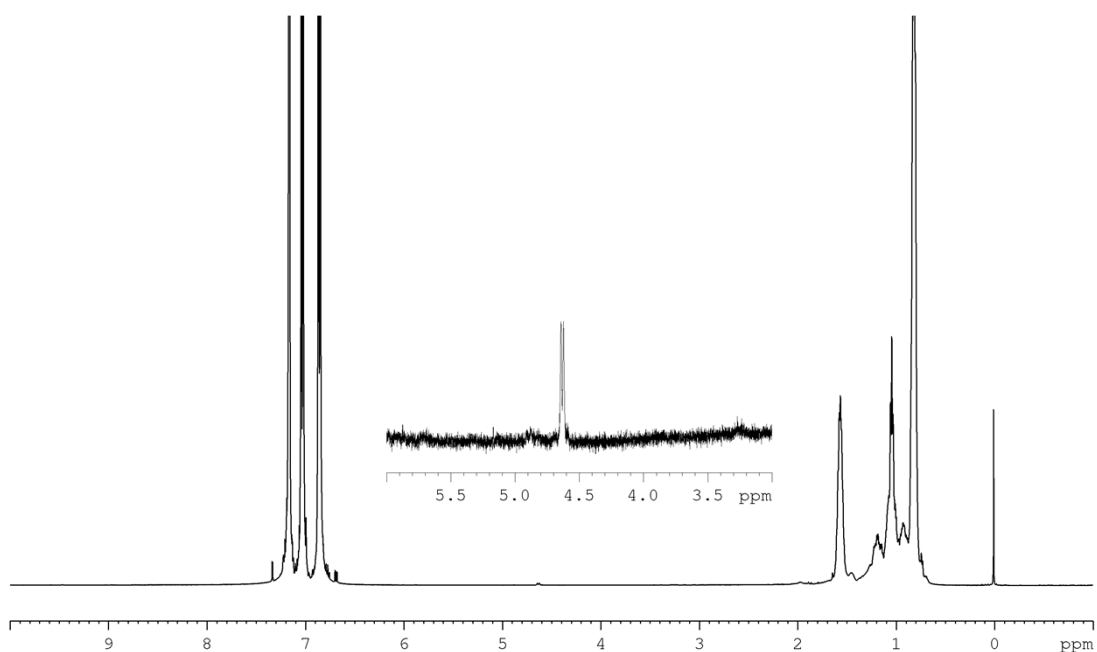

**Figure S2:**  $^1\text{H}$  NMR (398 K, 1,2,4-trichlorobenzene/ $\text{C}_6\text{D}_6$  (5:1), 500 MHz) of a P(P-co-MHB) copolymer produced with constrained geometry catalyst **4**/MAO ( $n_{\text{MHDi}} = 12.0$  mmol and  $[\text{Ti}] = 18.0$   $\mu\text{mol}\cdot\text{L}^{-1}$ ; Table 1, entry 13).

## Supporting Information

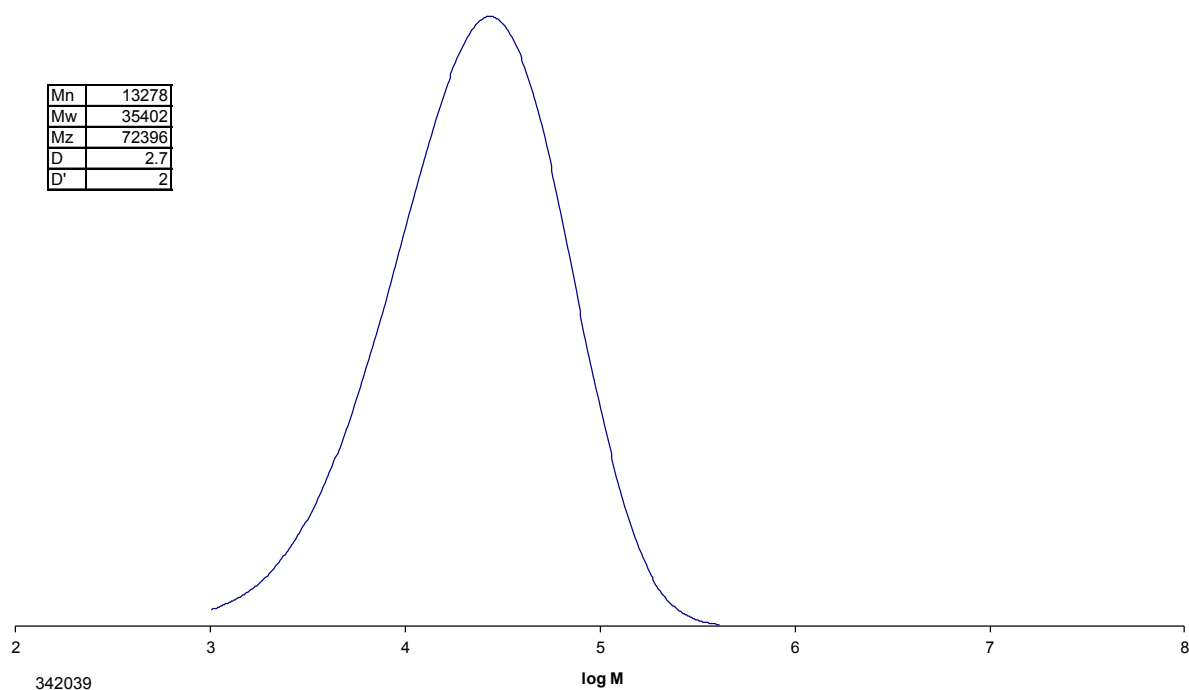

**Figure S3:** GPC trace of a P(P-*co*-MHB) copolymer produced with **1**/MAO ( $n_{\text{MHDi}} = 1.8$  mmol and  $[\text{Zr}] = 3.8 \mu\text{mol.L}^{-1}$ ; Table 1, entry 2).

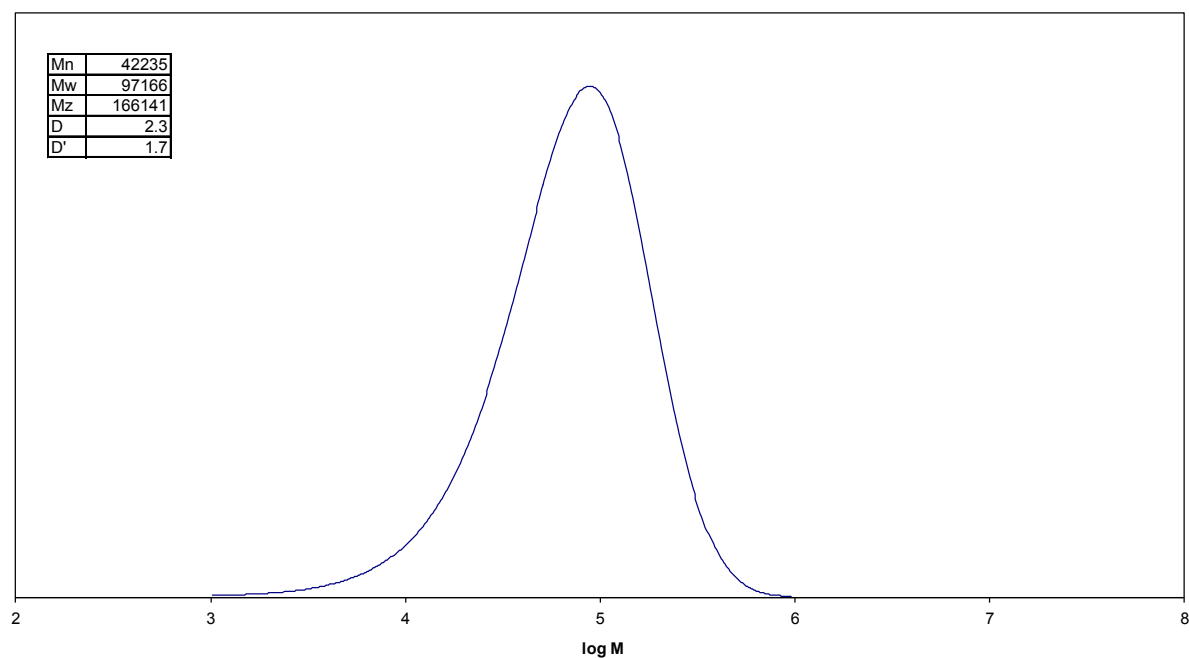

**Figure S4:** GPC trace of a P(P-*co*-MHB) copolymer produced with **2**/MAO ( $n_{\text{MHDi}} = 12.0$  mmol and  $[\text{Zr}] = 11.0 \mu\text{mol.L}^{-1}$ ; Table 1, entry 7).

## Supporting Information

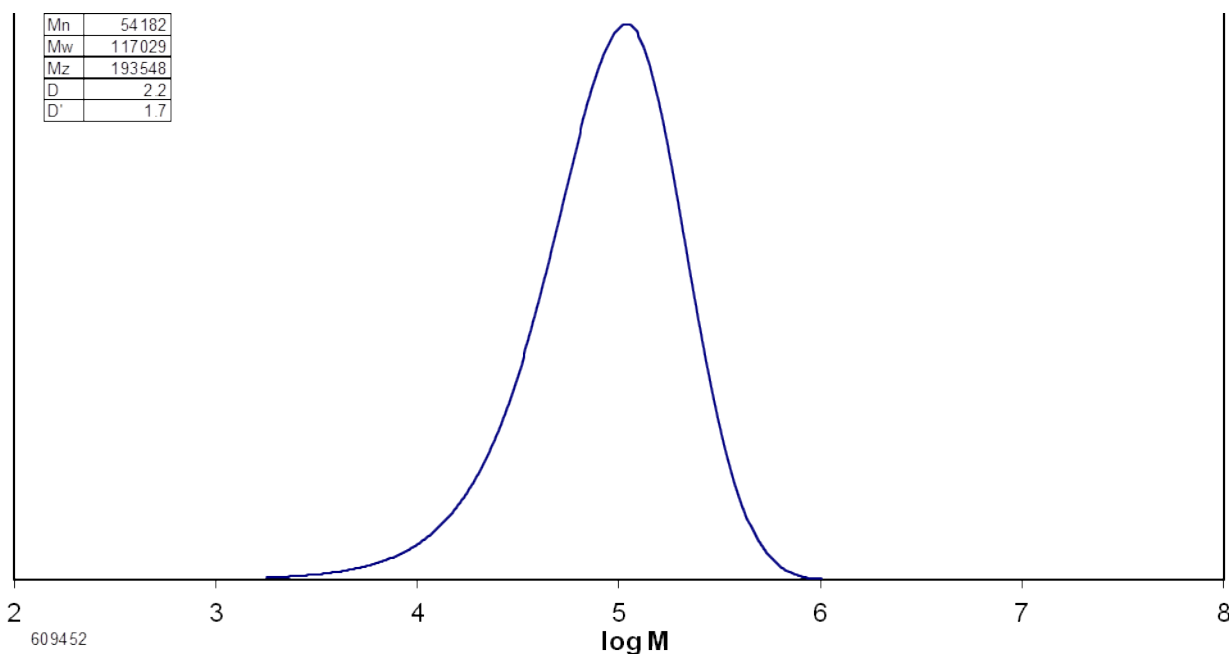

**Figure S5:** GPC trace of a P(P-*co*-MHB) copolymer produced with **3**/MAO ( $n_{\text{MHDi}} = 12.0$  mmol and  $[\text{Zr}] = 9.3 \mu\text{mol}\cdot\text{L}^{-1}$ ; Table 1, entry 11).

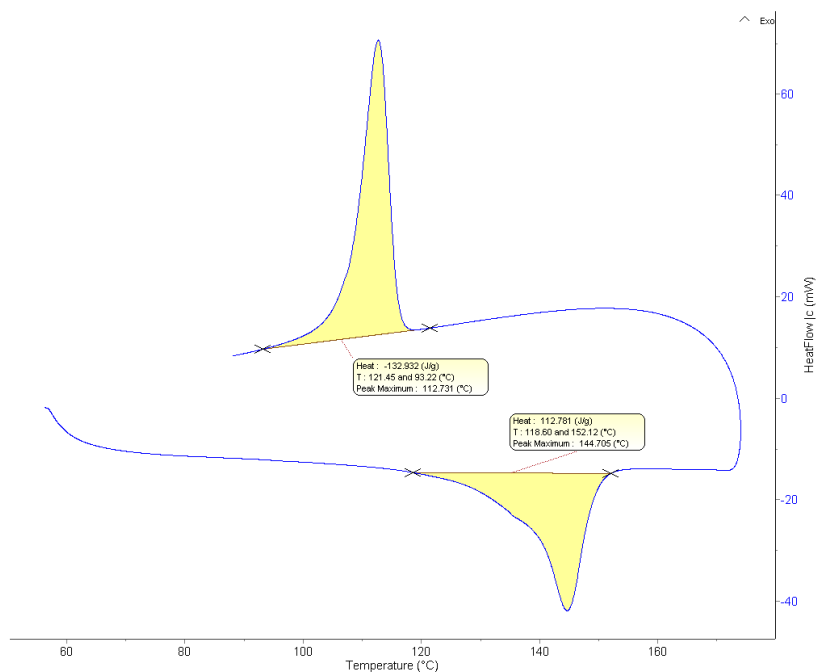

**Figure S6:** DSC thermogram of a P(P-*co*-MHB) copolymer produced by **1**/MAO ( $n_{\text{MHDi}} = 1.8$  mmol and  $[\text{Zr}] = 3.8 \mu\text{mol}\cdot\text{L}^{-1}$ ; Table 1, entry 3).

## Supporting Information

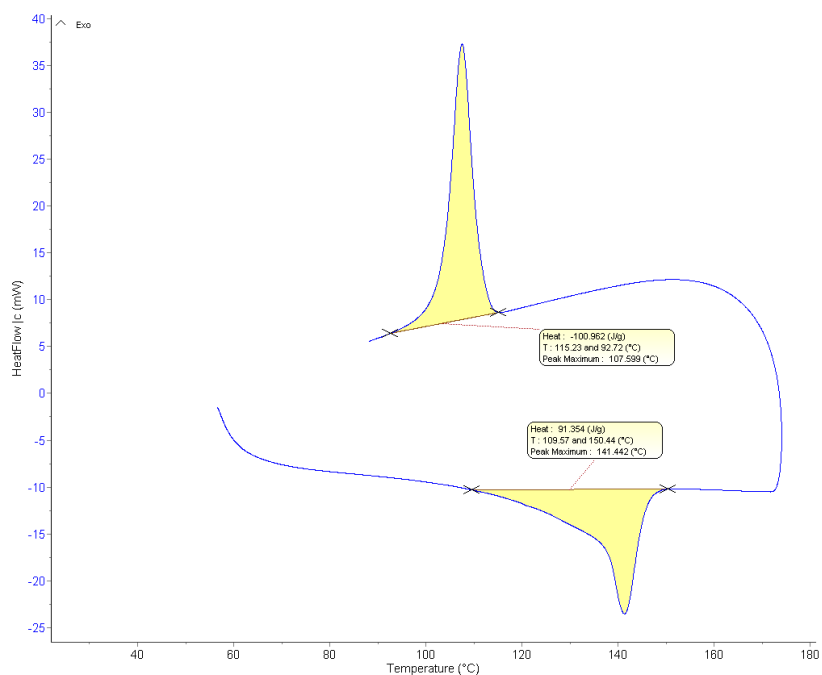

**Figure S7:** DSC thermogram of a P(P-co-MHB) copolymer produced by 2/MAO ( $n_{\text{MHDi}} = 12.0$  mmol and  $[\text{Zr}] = 9.3 \mu\text{mol.L}^{-1}$ ; Table 1, entry 8).

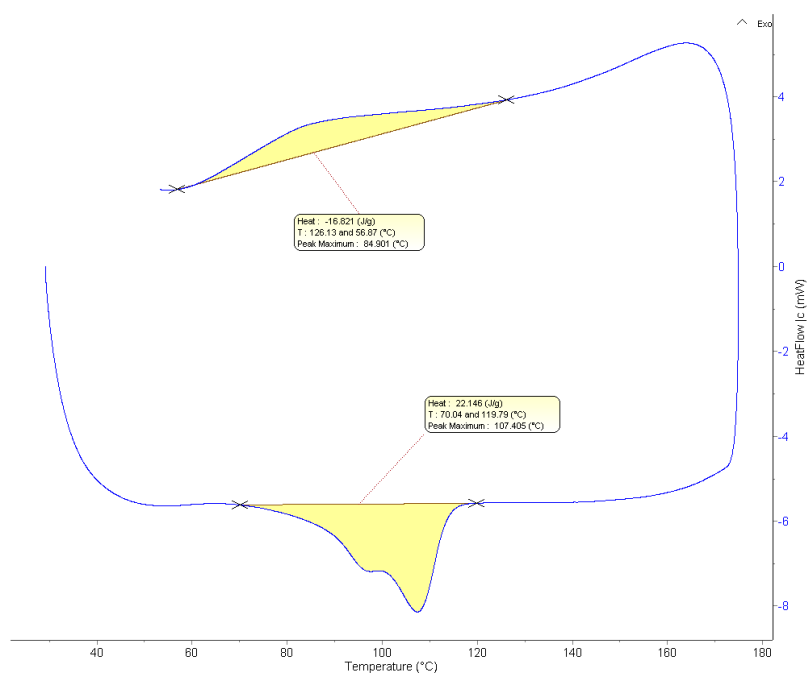

**Figure S8:** DSC thermogram of a P(P-co-MHB) copolymer produced by 3/MAO ( $n_{\text{MHDi}} = 12.0$  mmol and  $[\text{Zr}] = 9.3 \mu\text{mol.L}^{-1}$ ; Table 1, entry 11).
